# Supplementary material
Source: publisher site journal article supplement (https://www.kjim.org/upload/media/kjim-2020-195-suppl8.pdf)
Supplement: Supplementary file 1 [file kjim-2020-195-suppl8.pdf]

**Supplementary Table 8. Risk factors of ESKD in patients with clinical HT-N**

| Variable                        | B     | HR   | 95% CI    | p value |
|---------------------------------|-------|------|-----------|---------|
| GFR, mL/min/1.73 m <sup>2</sup> | -0.03 | 0.97 | 0.96-0.98 | < 0.001 |
| Hemoglobin, g/dL                | -0.07 | 0.93 | 0.87-0.99 | 0.03    |
| UPCR, g/g Cr                    | 0.40  | 1.49 | 1.17-1.90 | 0.001   |

Model was adjusted with age, gender, and related factors to ESKD, such as presence of hypertension, diastolic blood pressure, systolic blood pressure, serum albumin, hemoglobin, GFR, and UPCR.

ESKD, end-stage kidney disease; HT-N, hypertensive nephrosclerosis; HR, hazard ratio; CI, confidence interval; GFR, glomerular filtration rate; UPCR, urine protein-to-creatinine ratio.
